# Supplementary material for: The ratio and topology effects of benzodithiophene donor–benzooxadiazole acceptor fragments on the optoelectronic properties of donor molecules toward solar cell materials
Source: Royal Society of Chemistry journal article supplement (doi:10.1039/c4cp05814c), 2015-01-01
Supplement: c4cp05814c1.pdf [file c4cp05814c1.pdf]

## Supporting Information

For the Article entitled

**“The ratio and topology effects of benzodithiophene donor fragment to benzooxadiazole acceptor fragment on the optoelectronic properties of donor molecules toward solar cells materials”.**

*Shamsa Bibi and Jingping Zhang \**

*Faculty of Chemistry, Northeast Normal University, Changchun,*

*130024, PR China*

*\*Corresponding author:*

*Fax: +86-431-85684937*

*Tel: +86-431-85099372*

*E-mail: [jpzhang@nenu.edu.cn](mailto:jpzhang@nenu.edu.cn)*

## **Contents:**

- **SI:** Optimized Geometry Structures for the  $DA_n$ ,  $D_2A_n$ ,  $D_3A_n$  and  $D_4A_n$  Molecules
- **SII:** Frontier Molecular orbital (FMOs) of  $DA_n$  Designed Donor Molecules
- **SIII:** FMOs of the  $D_2A_n$ ,  $D_3A_n$  and  $D_4A_n$  Designed Donor Molecules
- **SIV:** Absolute Values of The Bond Length
- **SV:** FMOs Energy Data
- **SVI:** Total Molecular Energy of the Designed Molecules
- **SVII:** Absorption Properties
- **SVIII:** Dipole Moments ( $\mu$ )
- **SIX:** Molecular Orbital Compositions (in percentage)
- **SX:** Chemical Structure of PDIs
- **SXI:** Absorption Spectrum
- **SXII:** Reorganization Energy Values
- **SXIII:** Long Range Functionals Comparison

**SI: Optimized Geometry Structures for the  $DA_n$ ,  $D_2A_n$ ,  $D_3A_n$  and  $D_4A_n$  Molecules**

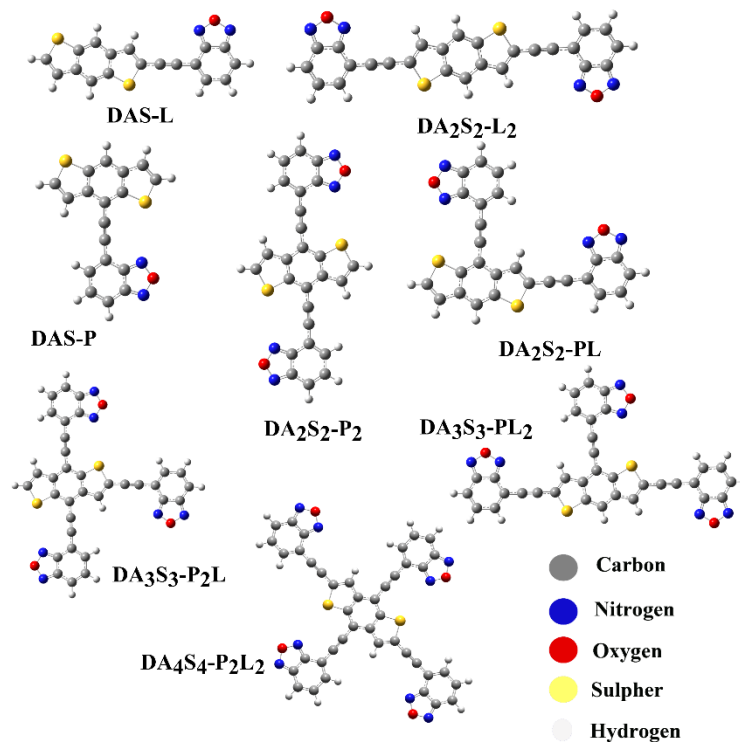

**Fig. S1a** Optimized geometry structures of the  $DA_n$  molecules.

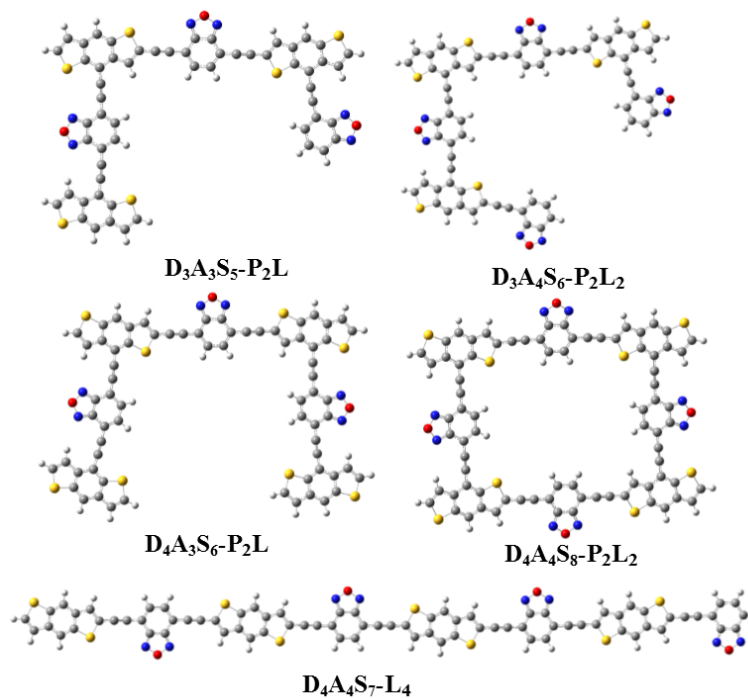

**Fig. S1b** Optimized geometry structures of the  $D_3A_n$  and  $D_4A_n$  molecules.

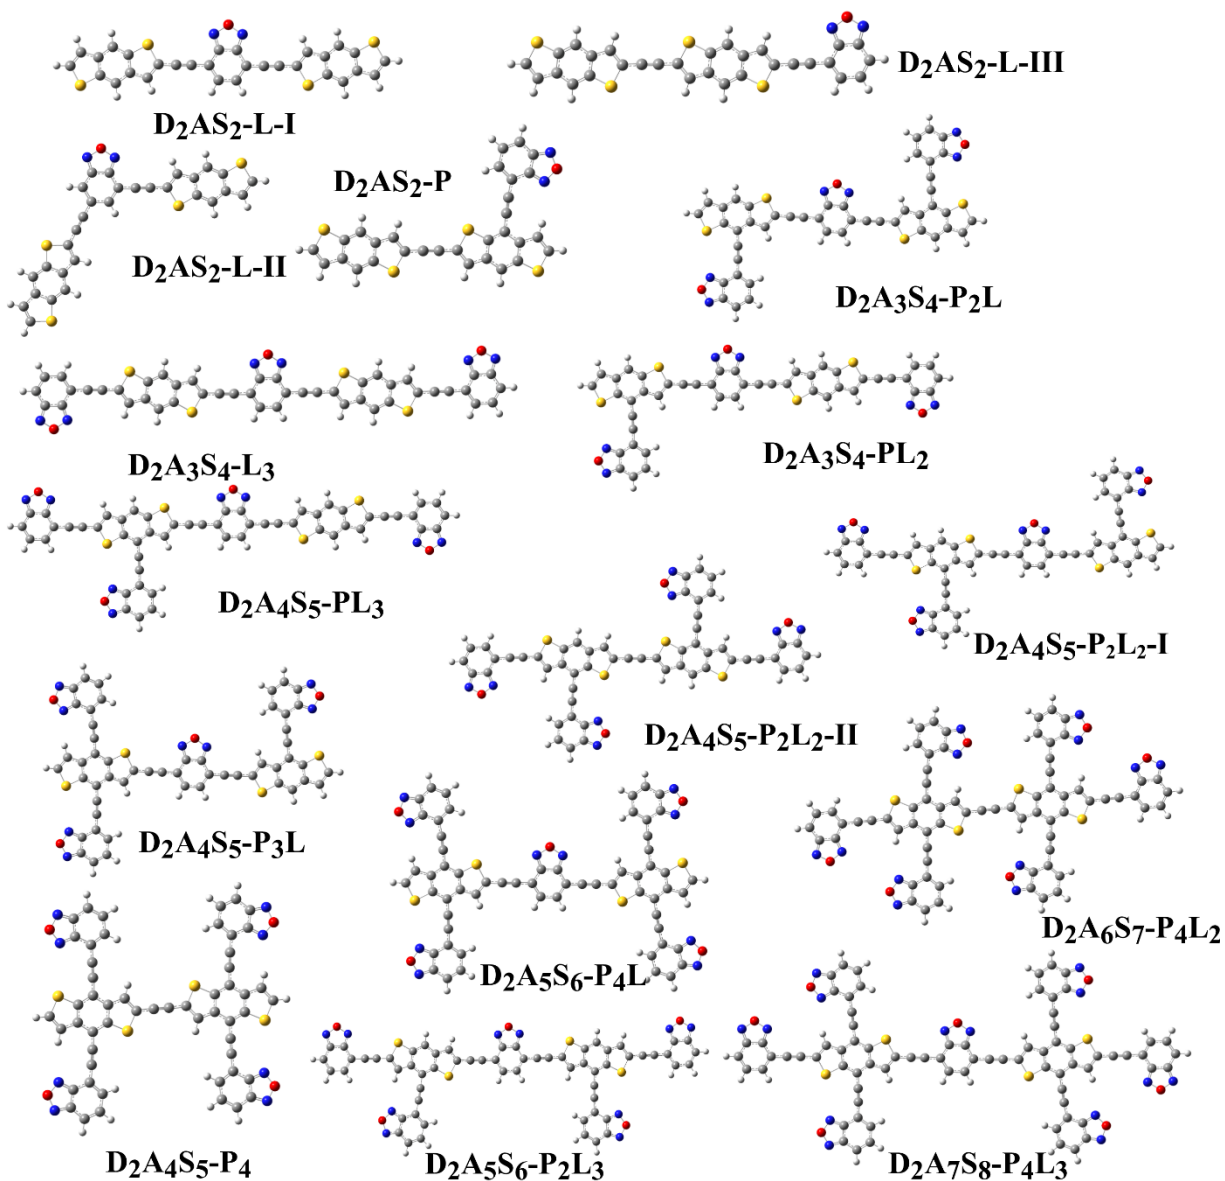

Fig. S1c Optimized geometry structures of the D<sub>2</sub>A<sub>n</sub> donor molecules.

## SII: Frontier Molecular orbital (FMOs) of $DA_n$ Designed Molecules

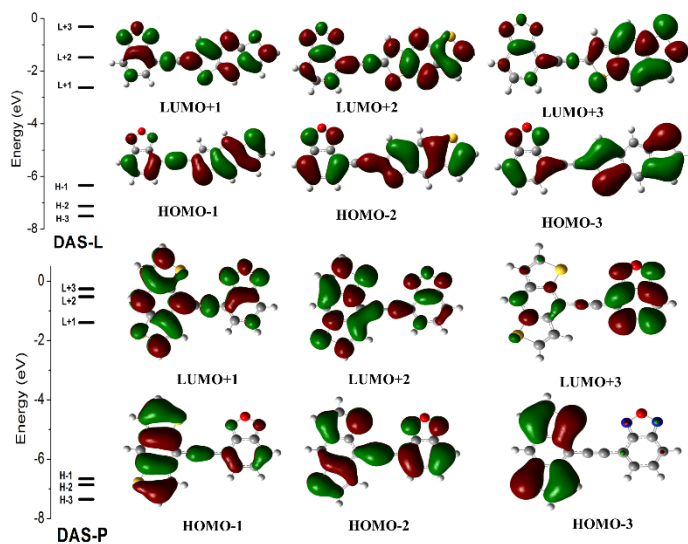

Fig. S2a FMOs energy level diagram for DA group molecules.

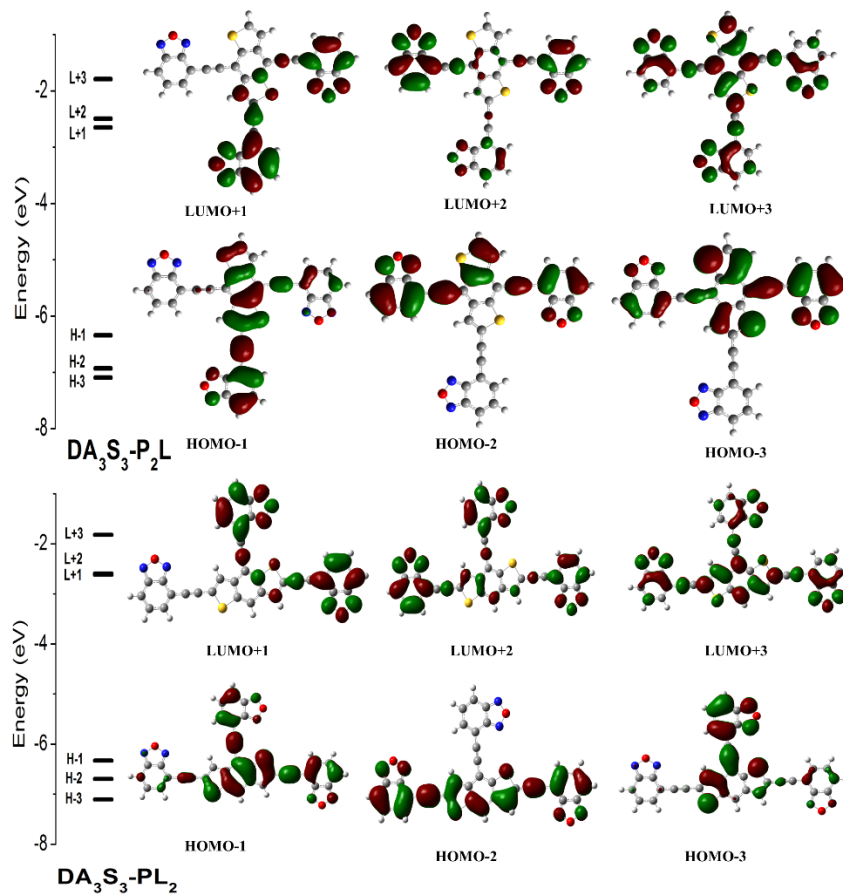

Fig. S2b FMOs energy level diagram for  $DA_3$  group molecules.

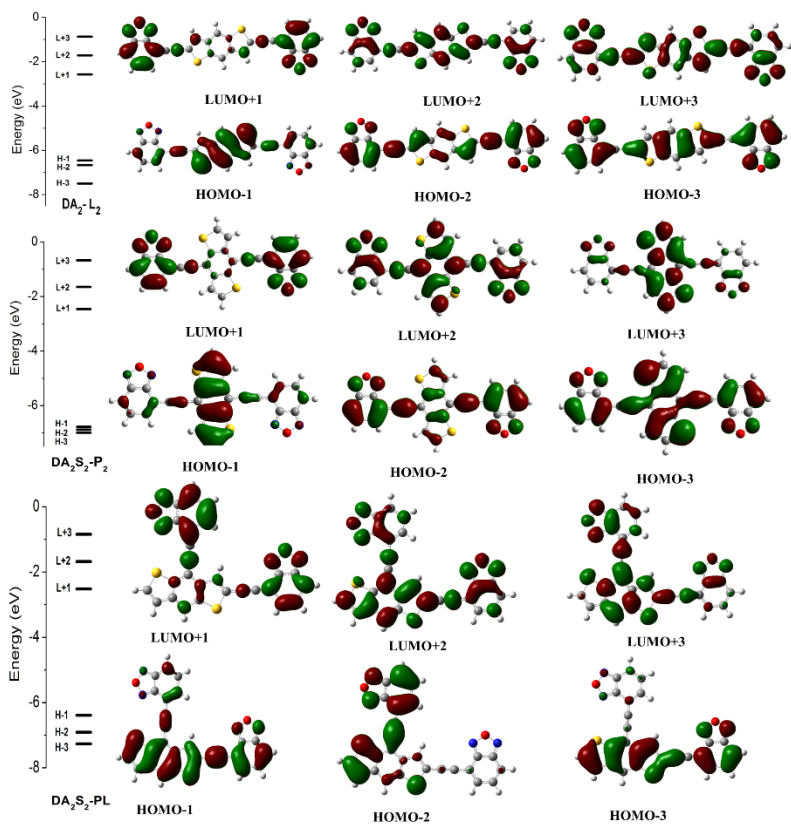

**Fig. S2c** FMOs energy level diagram for DA<sub>2</sub> group molecules.

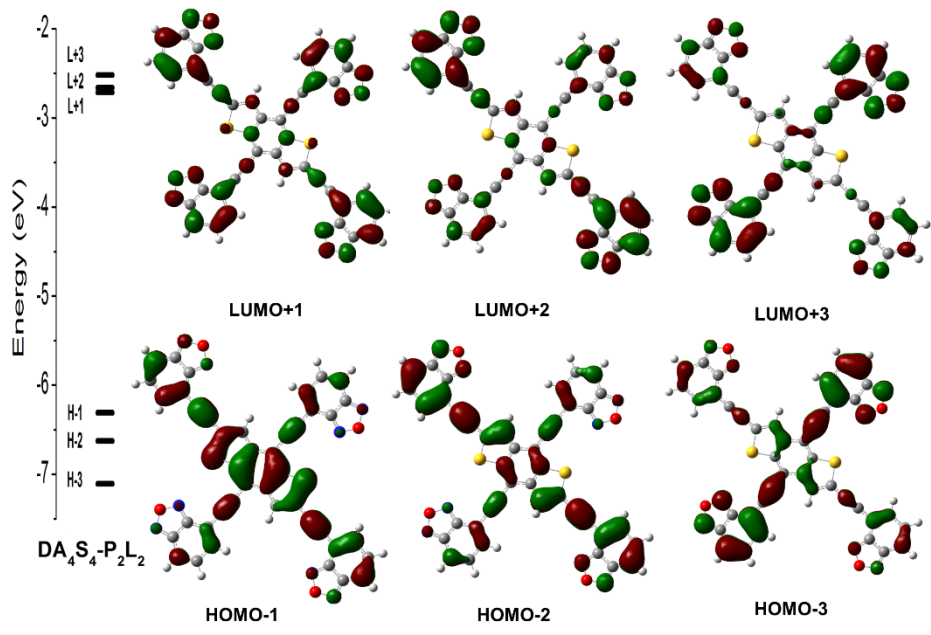

**Fig. S2d** FMOs energy level diagram for DA<sub>4</sub> group molecules

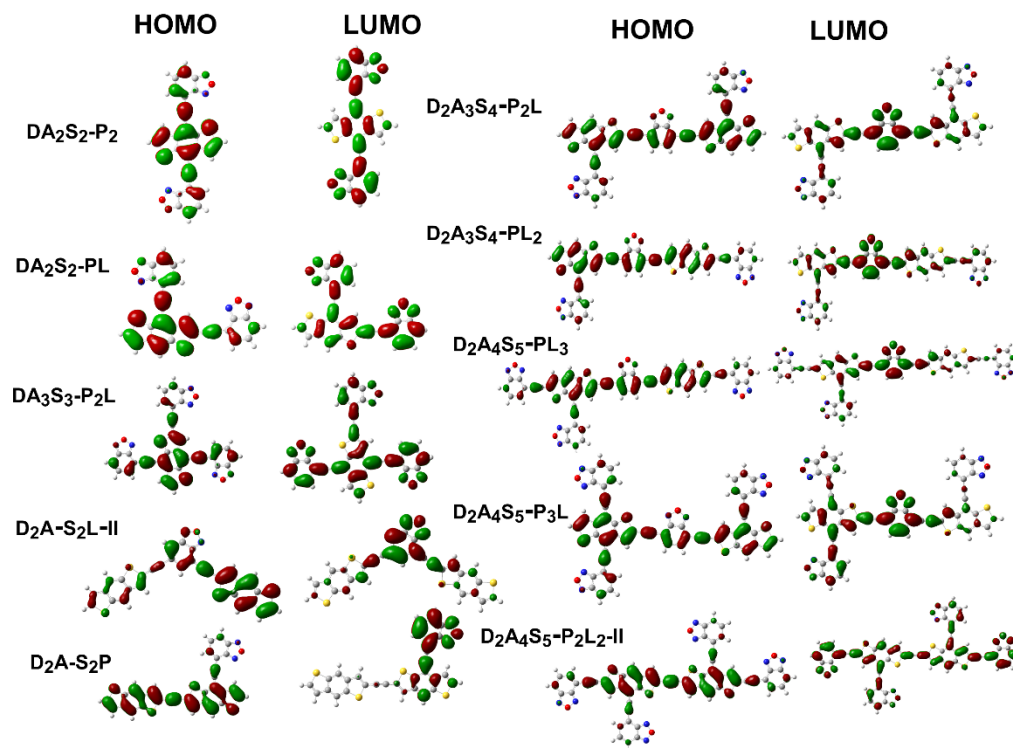

Fig. S2e HOMO and LUMO orbitals of  $DA_n$  and  $D_2A_n$  molecules.

***SIII: Frontier Molecular orbitals (FMOs) of the  $D_2A_n$ ,  $D_3A_n$  and  $D_4A_n$  Designed Molecules***

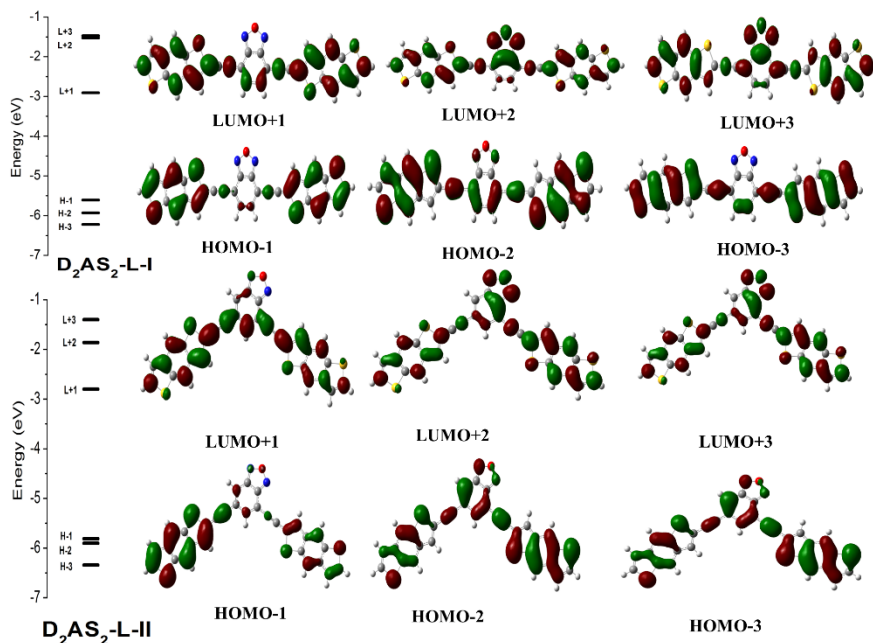

Fig. S3a FMOs energy level diagram for D<sub>2</sub>A group molecules.

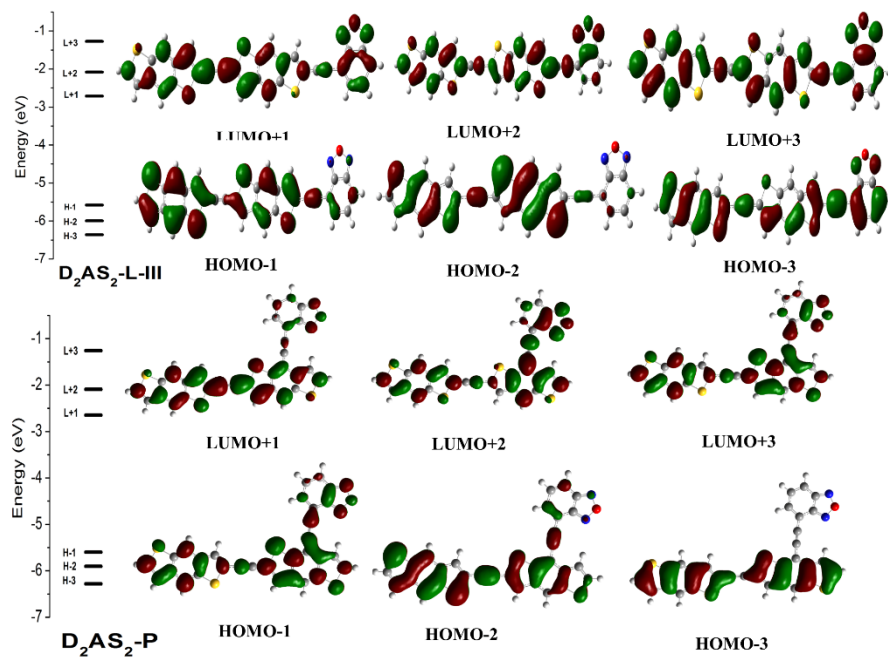

Fig. S3b FMOs energy level diagram for D<sub>2</sub>A group molecules.

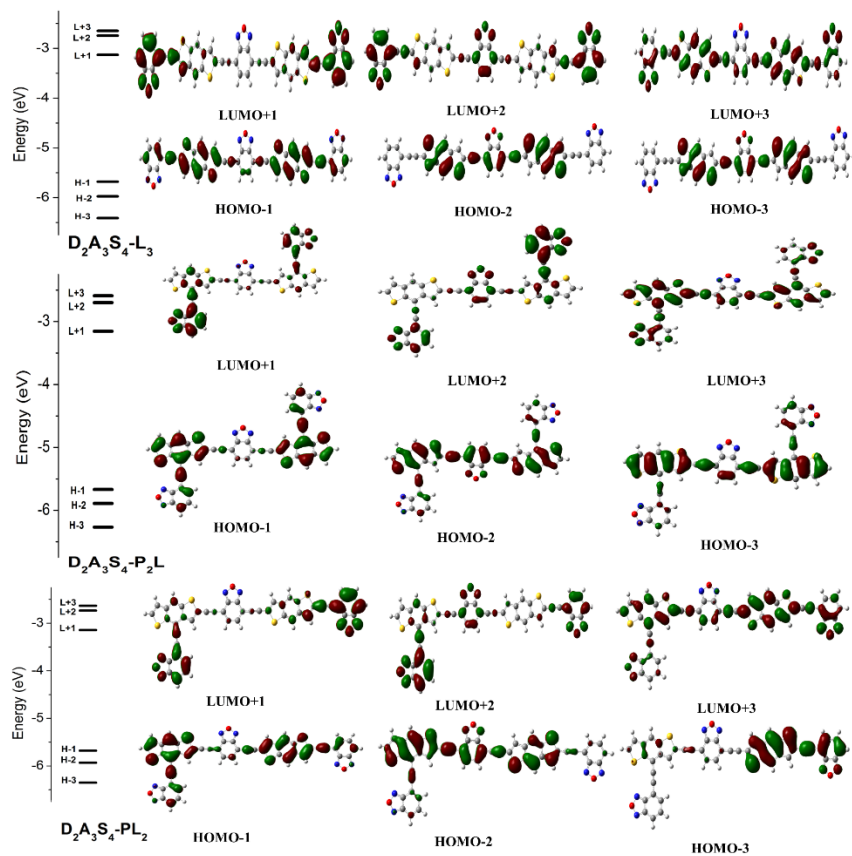



Fig. S3c FMOs energy level diagram for  $D_{2A_3}$  group molecules.

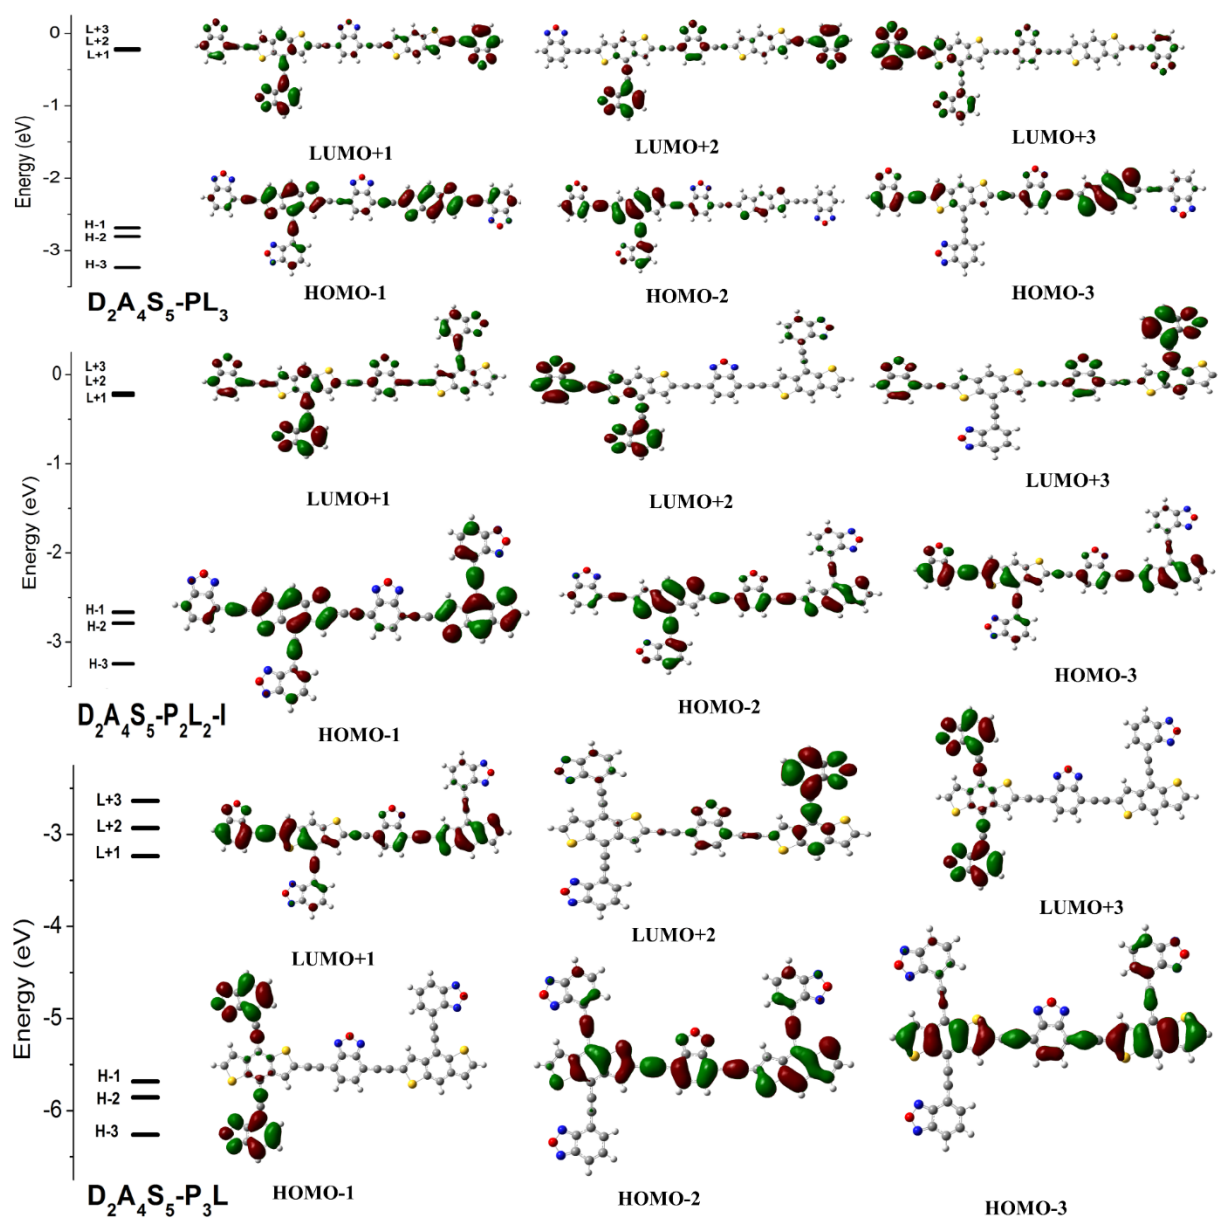

Fig. S3d FMOs energy level diagram for  $D_{2A_4}$  group molecules.

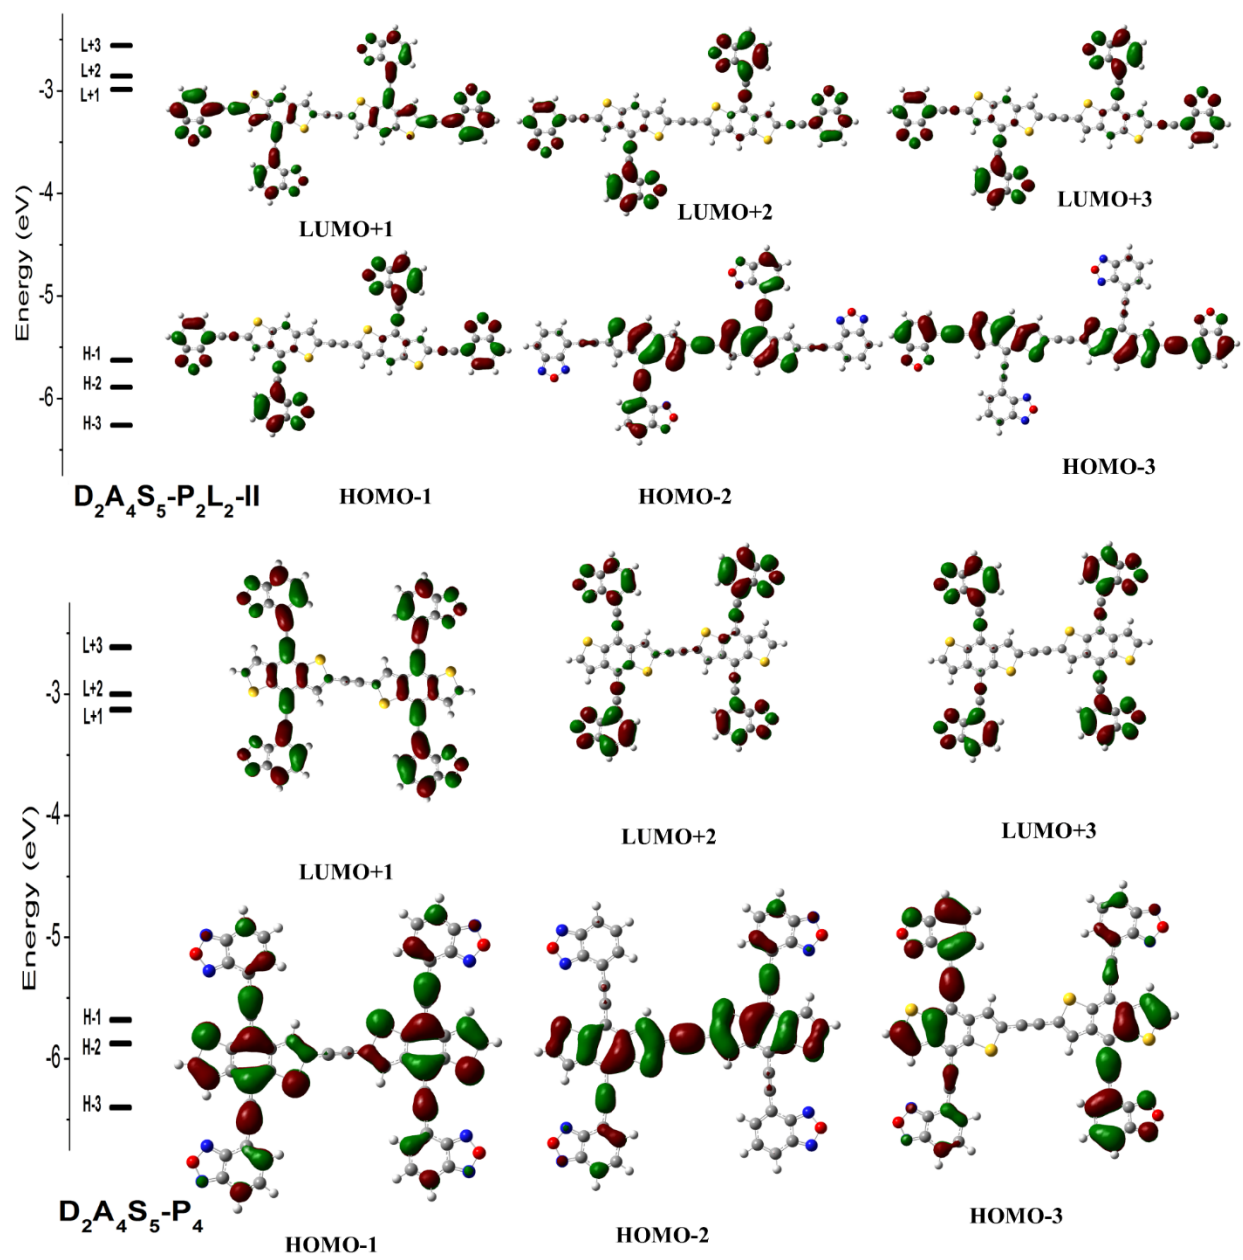

Fig. S3e FMOs energy level diagram for  $D_{2A_4}$  group molecules.

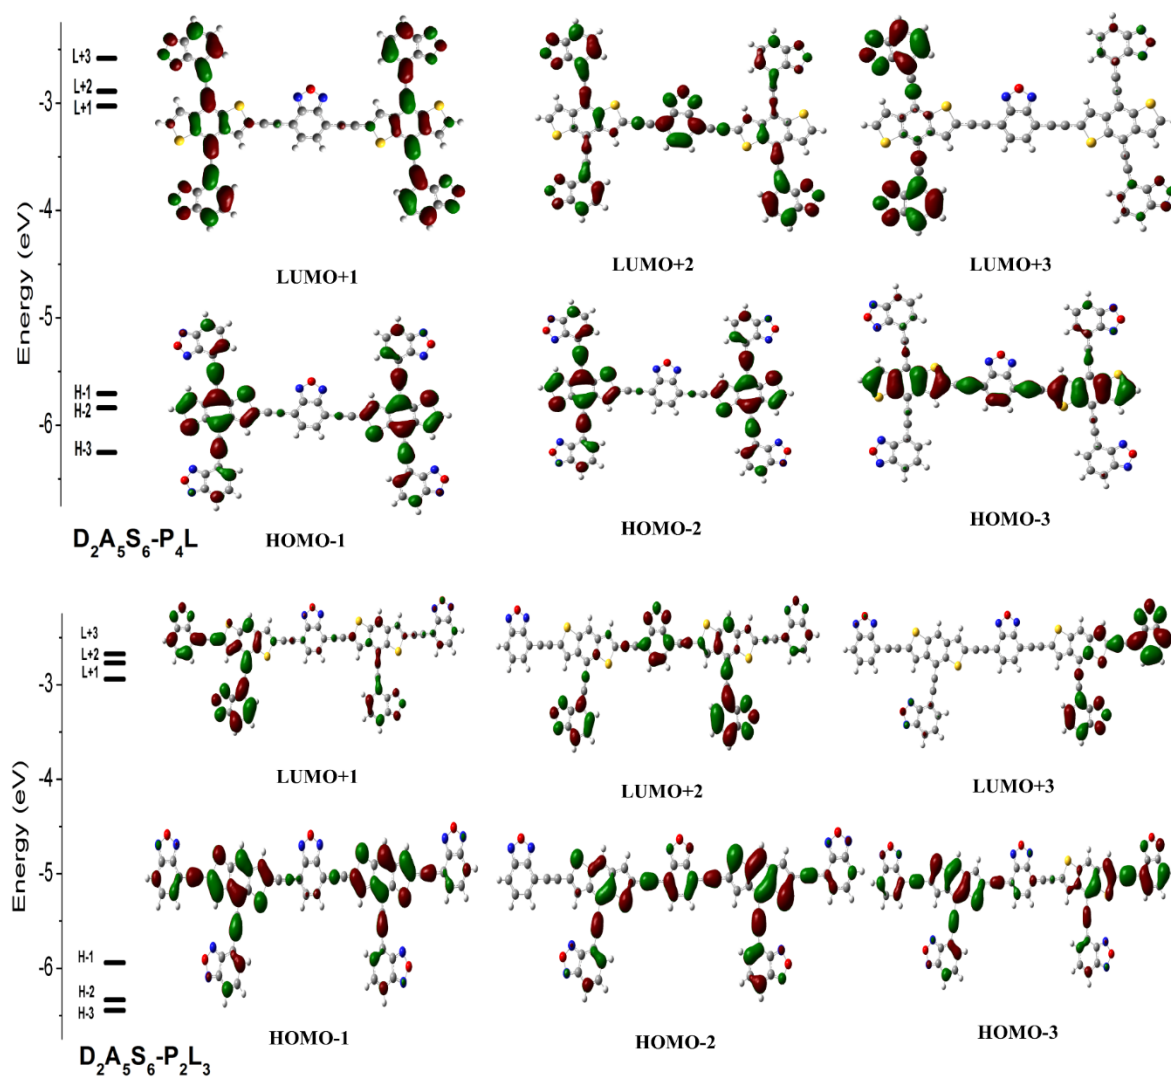

**Fig. S3f** FMOs energy level diagram for  $D_{2A_5}$  group molecules.

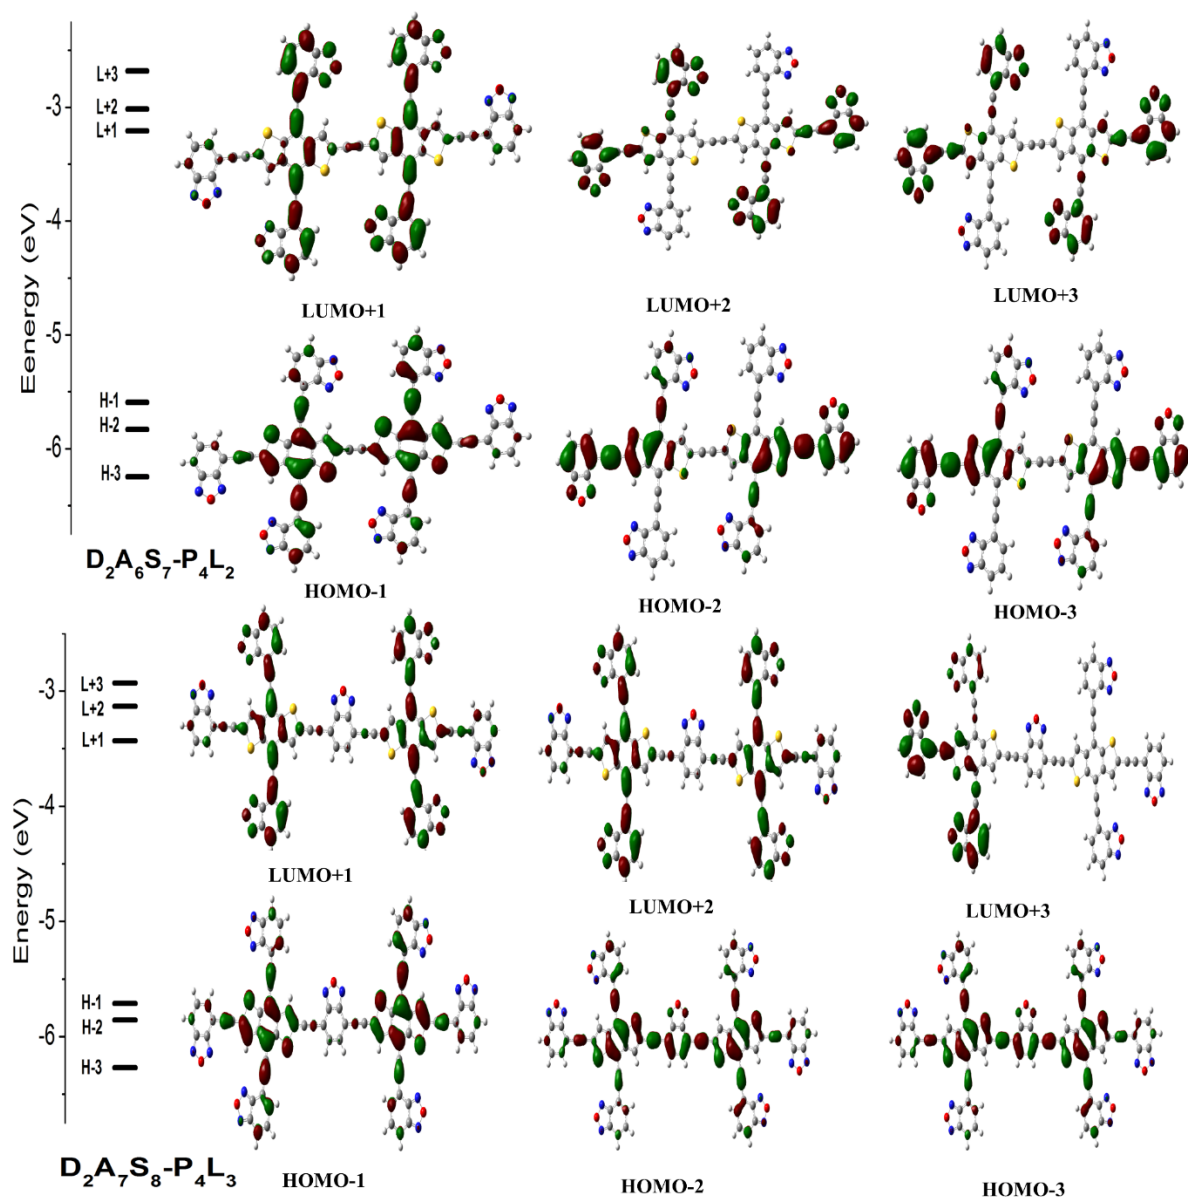

**Fig. S3g** FMOs energy level diagram for  $D_{2A_6}$  and  $D_{2A_7}$  group molecules.

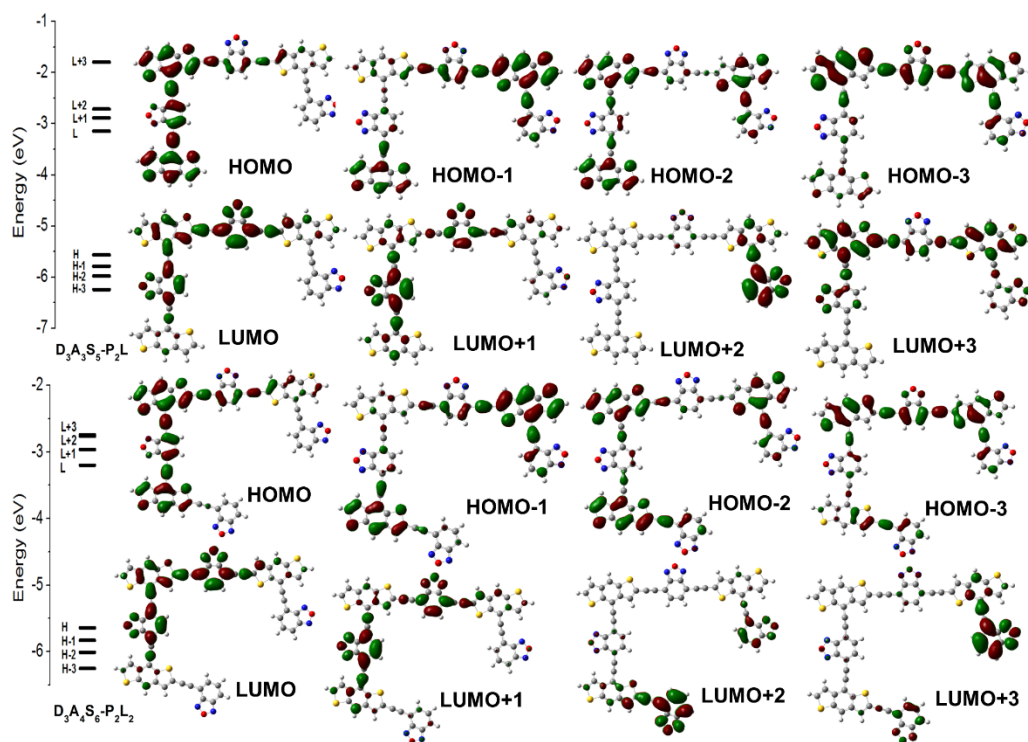

Fig. S3h FMOs energy level diagram for  $D_{3A_n}$  molecules.

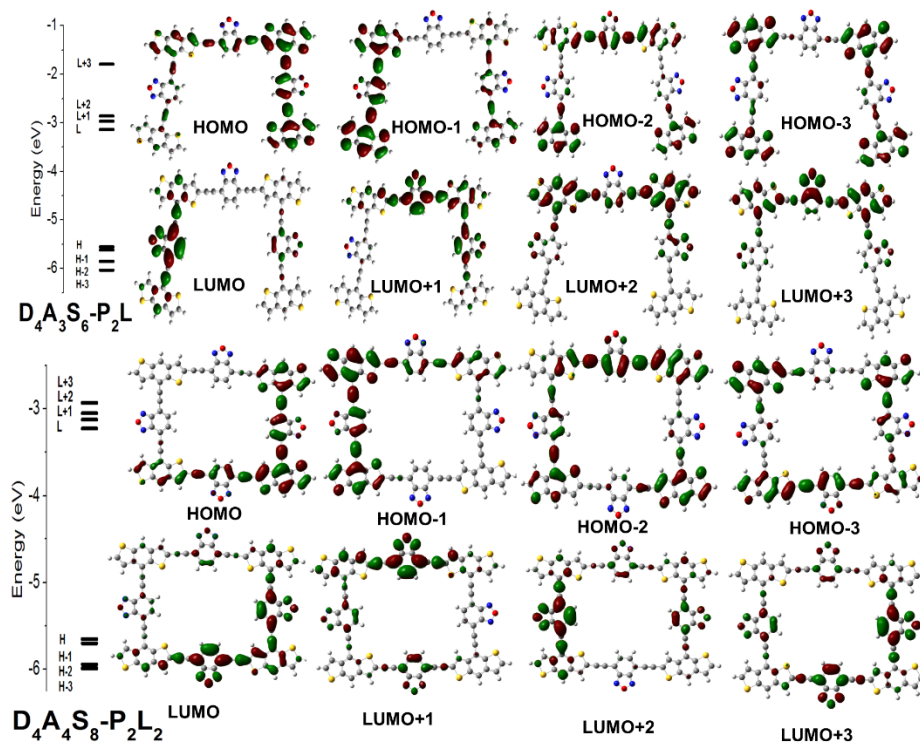

Fig. S3i FMOs energy level diagram for  $D_{4A_n}$  molecules.

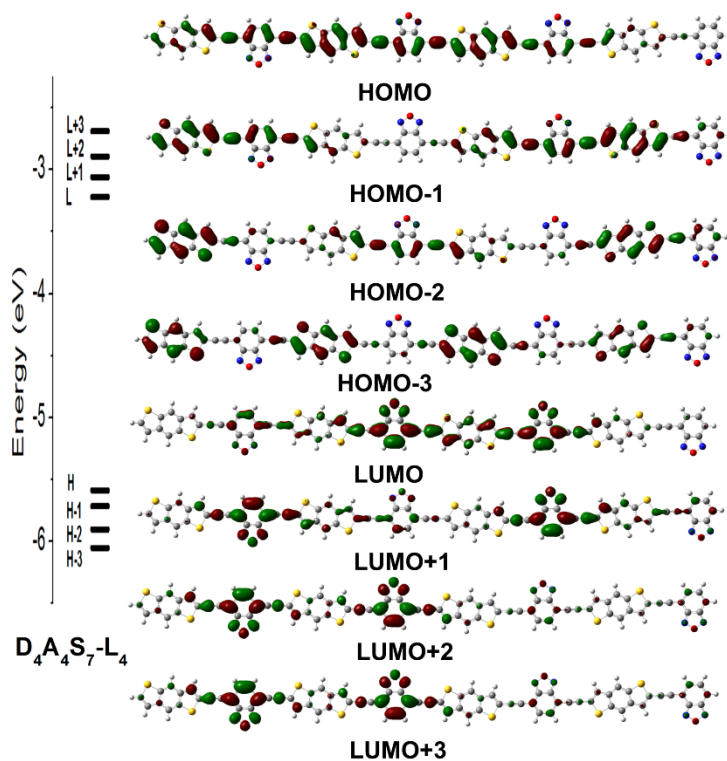

**Fig. S3j** FMOs energy level diagram for  $D_4A_4S_7-L_4$  molecule.

### *SIV: Absolute Values of The Bond Length*

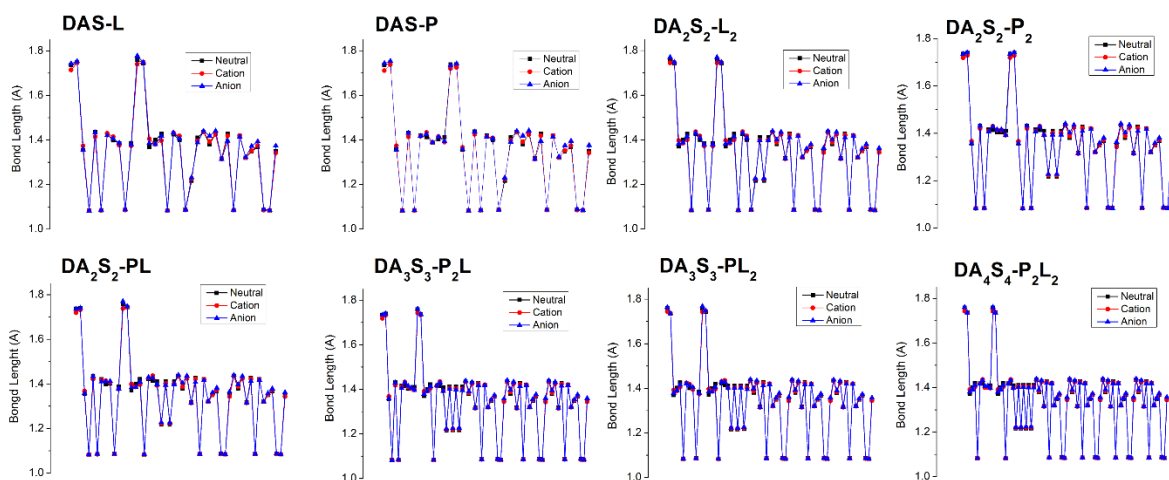

**Fig. S4a** Absolute values of the bond length differences between the neutral and ionic states for  $DA_n$  design molecules.

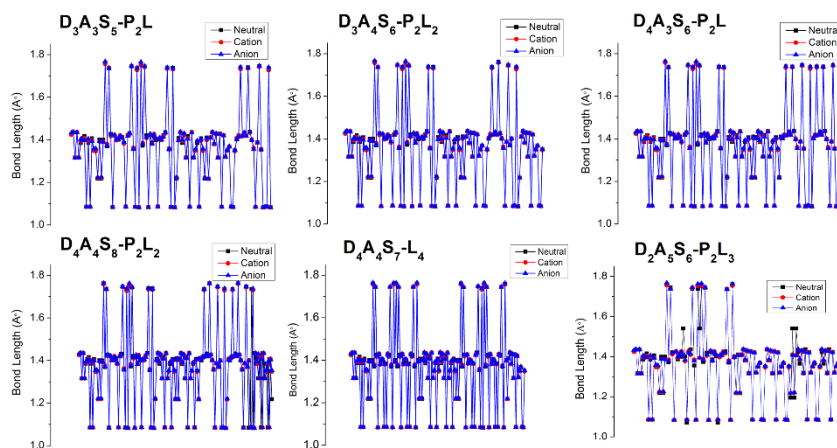

**Fig. S4b** Absolute values of the bond length differences between the neutral and ionic states for  $D_2A_5S_6-P_2L_3$ ,  $D_3A_n$  and  $D_4A_n$  designed molecules.

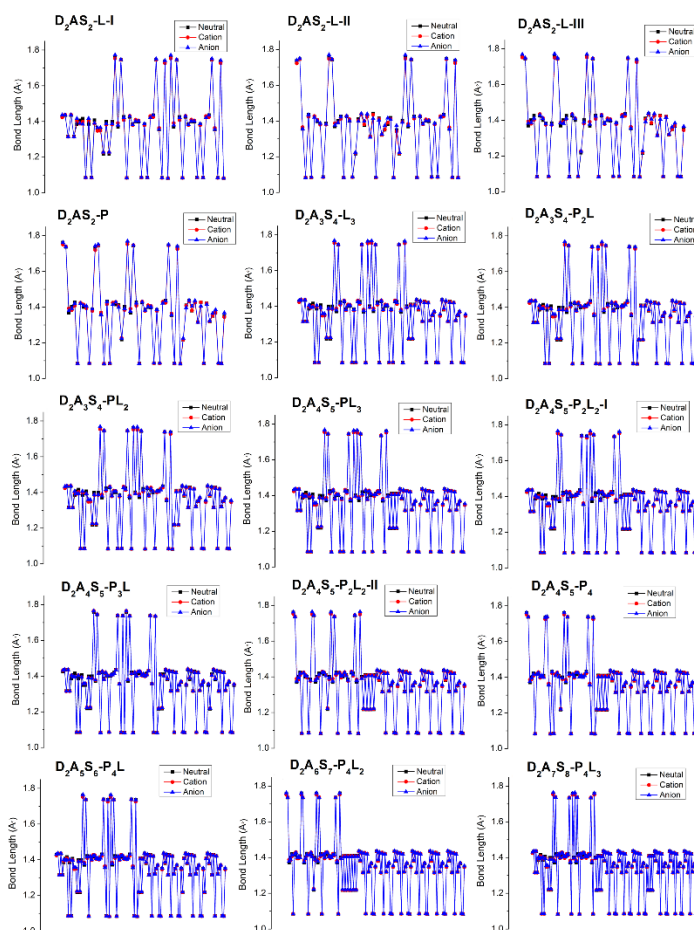

**Fig. S4c** Absolute values of the bond length differences between the neutral and ionic states for  $D_2A_n$  design molecules.

### ***SV: FMOs Energy Data***

**Table S1** Calculated energy data (in eV) of the FMOs of the DA<sub>n</sub> designed donor molecules. ( $E_{\text{HOMO}}$  = HOMO energy levels;  $E_{\text{LUMO}}$  = LUMO energy levels; and  $E_g = E_{\text{LUMO}} - E_{\text{HOMO}}$ ).

| Name                                                          | $E_{\text{HOMO}}$ (eV) | $E_{\text{LUMO}}$ (eV) | $E_g$ (eV) |
|---------------------------------------------------------------|------------------------|------------------------|------------|
| DAS-L                                                         | -5.80                  | -2.63                  | 3.17       |
| DAS-P                                                         | -5.70                  | -2.56                  | 3.14       |
| DA <sub>2</sub> S <sub>2</sub> -L <sub>2</sub>                | -5.82                  | -2.85                  | 2.97       |
| DA <sub>2</sub> S <sub>2</sub> -P <sub>2</sub>                | -5.66                  | -2.89                  | 2.77       |
| DA <sub>2</sub> S <sub>2</sub> -PL                            | -5.75                  | -2.83                  | 2.92       |
| DA <sub>3</sub> S <sub>3</sub> -P <sub>2</sub> L              | -5.72                  | -3.03                  | 2.69       |
| DA <sub>3</sub> S <sub>3</sub> -PL <sub>2</sub>               | -5.80                  | -3.00                  | 2.80       |
| DA <sub>4</sub> S <sub>4</sub> -P <sub>2</sub> L <sub>2</sub> | -5.75                  | -3.18                  | 2.57       |

| Name                                                                            | $E_{\text{HOMO}}$ (eV) | $E_{\text{LUMO}}$ (eV) | $E_g$ (eV) |
|---------------------------------------------------------------------------------|------------------------|------------------------|------------|
| D <sub>2</sub> AS <sub>2</sub> -L-I                                             | -5.61                  | -2.91                  | 2.7        |
| D <sub>2</sub> AS <sub>2</sub> -L-II                                            | -5.81                  | -2.80                  | 3.01       |
| D <sub>2</sub> AS <sub>2</sub> -L-III                                           | -5.58                  | -2.71                  | 2.87       |
| D <sub>2</sub> AS <sub>2</sub> -P                                               | -5.60                  | -2.65                  | 2.95       |
| D <sub>2</sub> A <sub>3</sub> S <sub>4</sub> -L <sub>3</sub>                    | -5.68                  | -3.13                  | 2.55       |
| D <sub>2</sub> A <sub>3</sub> S <sub>4</sub> -P <sub>2</sub> L                  | -5.67                  | -3.15                  | 2.52       |
| D <sub>2</sub> A <sub>3</sub> S <sub>4</sub> -PL <sub>2</sub>                   | -5.68                  | -3.14                  | 2.54       |
| D <sub>2</sub> A <sub>4</sub> S <sub>5</sub> -PL <sub>3</sub>                   | -5.70                  | -3.23                  | 2.47       |
| D <sub>2</sub> A <sub>4</sub> S <sub>5</sub> -P <sub>2</sub> L <sub>2</sub> -I  | -5.69                  | -3.24                  | 2.45       |
| D <sub>2</sub> A <sub>4</sub> S <sub>5</sub> -P <sub>3</sub> L                  | -5.68                  | -3.24                  | 2.44       |
| D <sub>2</sub> A <sub>4</sub> S <sub>5</sub> -P <sub>2</sub> L <sub>2</sub> -II | -5.63                  | -2.99                  | 2.64       |
| D <sub>2</sub> A <sub>4</sub> S <sub>5</sub> -P <sub>4</sub>                    | -5.68                  | -3.13                  | 2.55       |
| D <sub>2</sub> A <sub>5</sub> S <sub>6</sub> -P <sub>4</sub> L                  | -5.71                  | -3.30                  | 2.41       |
| D <sub>2</sub> A <sub>5</sub> S <sub>6</sub> -P <sub>2</sub> L <sub>3</sub>     | -5.72                  | -3.29                  | 2.43       |
| D <sub>2</sub> A <sub>6</sub> S <sub>7</sub> -P <sub>4</sub> L <sub>2</sub>     | -5.59                  | -3.21                  | 2.38       |
| D <sub>2</sub> A <sub>7</sub> S <sub>8</sub> -P <sub>4</sub> L <sub>3</sub>     | -5.71                  | -3.43                  | 2.28       |

**Table S2** Calculated energy data (in eV) of the FMOs of the D<sub>2</sub>A<sub>n</sub> designed donor molecules.



**Table S3** Calculated energy data (in eV) of the FMOs of the  $D_3A_n$  and  $D_4A_n$  designed donor molecules.

| Name               | HOMO (eV) | LUMO (eV) | Eg (eV) |
|--------------------|-----------|-----------|---------|
| $D_3A_3S_5-P_2L$   | -5.57     | -3.14     | 2.43    |
| $D_3A_4S_6-P_2L_2$ | -5.64     | -3.20     | 2.44    |
| $D_4A_3S_6-P_2L$   | -5.55     | -3.14     | 2.41    |
| $D_4A_4S_8-P_2L_2$ | -5.65     | -3.22     | 2.43    |
| $D_4A_4S_7-L_4$    | -5.59     | -3.22     | 2.37    |

***SVI: Total Molecular Energy of the Designed Molecules***

**Table S4** Total energies of the  $DA_n$  investigated molecules in KJ/mol.

| Name          | Total Energy | Name             | Total Energy |
|---------------|--------------|------------------|--------------|
| DAS-L         | -4385626.77  | $DA_2S_2-PL$     | -5672352.90  |
| DAS-P         | -4385625.80  | $DA_3S_3-P_2L$   | -6959079.03  |
| $DA_2S_2-L_2$ | -5672351.93  | $DA_3S_3-PL_2$   | -6959079.03  |
| $DA_2S_2-P_2$ | -5672352.90  | $DA_4S_4-P_2L_2$ | -8245693.24  |

**Table S5** Total energies of the  $D_2A_n$ ,  $D_3A_n$  and  $D_4A_n$  investigated molecules in KJ/mol.

| Name             | Total Energy | Name                  | Total Energy | Name               | Total Energy |
|------------------|--------------|-----------------------|--------------|--------------------|--------------|
| $D_2AS_2-L-I$    | -7681166.38  | $D_2A_4S_5-PL_3$      | -11541421.00 | $D_2A_6S_7-P_4L_2$ | -14114940.80 |
| $D_2AS_2-L-II$   | -7681161.56  | $D_2A_4S_5-P_2L_2-I$  | -11541421.97 | $D_2A_7S_8-P_4L_3$ | -15401679.48 |
| $D_2AS_2-L-III$  | -7681170.24  | $D_2A_4S_5-P_3L$      | -11541427.76 | $D_3A_3S_5-P_2L$   | -13550193.00 |
| $D_2AS_2-P$      | -7681174.10  | $D_2A_4S_5-P_2L_2-II$ | -11541425.83 | $D_3A_4S_6-P_2L_2$ | -14836943.25 |
| $D_2A_3S_4-L_3$  | -10254669.78 | $D_2A_4S_5-P_4$       | -11541433.54 | $D_4A_3S_6-P_2L$   | -16845712.36 |
| $D_2A_3S_4-P_2L$ | -10254670.75 | $D_2A_5S_6-P_4L$      | -12828183.80 | $D_4A_4S_8-P_2L_2$ | -18329071.69 |
| $D_2A_3S_4-PL_2$ | -10254670.75 | $D_2A_5S_6-P_2L_3$    | -12828176.08 | $D_4A_4S_7-L_4$    | -16845697.89 |

## SVII: Absorption Properties

**Table S6** Calculated excitation energies (Ex), wavelength ( $\lambda_{\text{abs}}$ ), oscillator strength ( $f$ ), and composition in terms of molecular orbitals with related character (H = HOMO, L = LUMO) for DA<sub>4</sub>S<sub>4</sub>-P<sub>2</sub>L<sub>2</sub>, D<sub>2</sub>A<sub>6</sub>S<sub>7</sub>-P<sub>4</sub>L<sub>2</sub>, D<sub>2</sub>A<sub>7</sub>S<sub>8</sub>-P<sub>4</sub>L<sub>3</sub>, D<sub>3</sub>A<sub>4</sub>S<sub>6</sub>-P<sub>2</sub>L<sub>2</sub>, D<sub>4</sub>A<sub>4</sub>S<sub>8</sub>-P<sub>2</sub>L<sub>2</sub> and D<sub>4</sub>A<sub>4</sub>S<sub>7</sub>-L<sub>4</sub>.

| Donor Name                                                                  | Transition state | Ex (eV) | $\lambda_{\text{abs}}$ (nm) | $f$ (a.u.)      | Assignment              |
|-----------------------------------------------------------------------------|------------------|---------|-----------------------------|-----------------|-------------------------|
| DA <sub>4</sub> S <sub>4</sub> -P <sub>2</sub> L <sub>2</sub>               | S0→S1            | 2.24    | 554                         | 0.20            | H→L                     |
|                                                                             | S0→S4            | 2.69    | 460                         | 1.44            | H-1→L                   |
|                                                                             | S0→S7            | 3.15    | 394                         | 0.33            | H-1→L+1                 |
|                                                                             | S0→S17           | 3.91    | 317                         | 0.38            | H-1→L+4, H→L+5.         |
| D <sub>2</sub> A <sub>6</sub> S <sub>7</sub> -P <sub>4</sub> L <sub>2</sub> | S0→S1            | 2.05    | 605                         | 1.32            | H→L                     |
|                                                                             | S0→S5            | 2.50    | 495                         | 0.33            | H→L+2                   |
|                                                                             | S0→S7            | 2.61    | 474                         | 1.64            | H-2→L, H→L+2.           |
| D <sub>2</sub> A <sub>7</sub> S <sub>8</sub> -P <sub>4</sub> L <sub>3</sub> | S0→S1            | 1.93    | 642                         | 2.27            | H→L                     |
|                                                                             | S0→S5            | 2.43    | 510                         | 1.88            | H-2→L, H-1→L+1          |
|                                                                             | S0→S15           | 2.91    | 426                         | 0.42            | H-3→L+3, H-2→L+2.       |
| D <sub>3</sub> A <sub>4</sub> S <sub>6</sub> -P <sub>2</sub> L <sub>2</sub> | S0→S1            | 2.00    | 617                         | 1.35            | H→L                     |
|                                                                             | S0→S3            | 2.34    | 530                         | 0.79            | H→L+1, H-1→L            |
|                                                                             | S0→S6            | 2.59    | 479                         | 0.25            | H-1→L+1, H→L+3          |
|                                                                             | S0→S8            | 2.66    | 465                         | 0.85            | H-3→L, H-2→L+1          |
|                                                                             | S0→S12           | 2.86    | 434                         | 0.16            | H-4→L, H-4→L+1          |
|                                                                             | S0→S21           | 3.34    | 371                         | 0.23            | H-6→L, H-4→L+2.         |
| D <sub>4</sub> A <sub>4</sub> S <sub>8</sub> -P <sub>2</sub> L <sub>2</sub> | S0→S1            | 1.97    | 629                         | 0.37            | H→L, H-1→L+1            |
|                                                                             | S0→S2            | 2.19    | 566                         | 1.30            | H-1→L+2, H→L            |
|                                                                             | S0→S4            | 2.25    | 549                         | 0.97            | H-1→L+1, H→L+1          |
|                                                                             | S0→S5            | 2.27    | 546                         | 0.51            | H-1→L+1, H-1→L+2        |
|                                                                             | S0→S6            | 2.32    | 534                         | 0.32            | H→L+2, H→L              |
|                                                                             | S0→S9            | 2.46    | 503                         | 1.18            | H-2→L+1, H-1→L+2        |
|                                                                             | S0→S10           | 2.48    | 498                         | 0.28            | H-3→L, H-2→L+1, H-1→L+2 |
|                                                                             | S0→S13           | 2.58    | 479                         | 0.32            | H-2→L+2, H→L+3          |
|                                                                             | S0→S16           | 2.73    | 454                         | 0.16            | H-3→L+3, H-3→L+1        |
| S0→S18                                                                      | 2.80             | 443     | 0.32                        | H-5→L, H-5→L+1. |                         |
| D <sub>4</sub> A <sub>4</sub> S <sub>7</sub> -L <sub>4</sub>                | S0→S1            | 1.96    | 631                         | 6.36            | H→L                     |

|        |      |     |      |                |
|--------|------|-----|------|----------------|
| S0→S4  | 2.41 | 514 | 0.54 | H-1→L+1, H→L+2 |
| S0→S6  | 2.49 | 496 | 0.18 | H-1→L+1, H→L   |
| S0→S12 | 2.78 | 446 | 0.50 | H-5→L, H-4→L   |

### SVIII: Diploe Moments ( $\mu$ )

**Table S7** Dipole moments values for the all  $DA_n$ ,  $D_2A_n$ ,  $D_3A_n$  and  $D_4A_n$  investigated molecules.

| Name             | $\mu$ (Debye) | Name                  | $\mu$ (Debye) |
|------------------|---------------|-----------------------|---------------|
| DAS-L            | 3.94          | $D_2A_4S_5-PL_3$      | 4.86          |
| DAS-P            | 3.67          | $D_2A_4S_5-P_2L_2-I$  | 7.48          |
| $DA_2S_2-L_2$    | 0.41          | $D_2A_4S_5-P_3L$      | 5.47          |
| $DA_2S_2-P_2$    | 0.10          | $D_2A_4S_5-P_2L_2-II$ | 0.53          |
| $DA_2S_2-PL$     | 5.17          | $D_2A_4S_5-P_4$       | 0.72          |
| $DA_3S_3-P_2L$   | 3.72          | $D_2A_5S_6-P_4L$      | 3.65          |
| $DA_3S_3-PL_2$   | 3.64          | $D_2A_5S_6-P_2L_3$    | 11.36         |
| $DA_4S_4-P_2L_2$ | 0.20          | $D_2A_6S_7-P_4L_2$    | 0.52          |
| $D_2AS_2-L-I$    | 3.62          | $D_2A_7S_8-P_4L_3$    | 3.83          |
| $D_2AS_2-L-II$   | 4.97          | $D_3A_3S_5-P_2L$      | 3.83          |
| $D_2AS_2-L-III$  | 4.03          | $D_3A_4S_6-P_2L_2$    | 3.90          |
| $D_2AS_2-P$      | 4.10          | $D_4A_3S_6-P_2L$      | 5.04          |
| $D_2A_3S_4-L_3$  | 3.47          | $D_4A_4S_8-P_2L_2$    | 5.81          |
| $D_2A_3S_4-P_2L$ | 3.51          | $D_4A_4S_7-L_4$       | 1.42          |
| $D_2A_3S_4-PL_2$ | 3.09          |                       |               |

Dipole moments ( $\mu$ ) of all designed molecules are summarized in supporting information. We made a comparison of  $\mu$  values with optical properties i.e., the largest intensity of absorption and  $\lambda_{max}$  wavelength for all designed molecules. Among the  $DA_n$ ,  $D_2A_n$ ,  $D_3A_n$  and  $D_4A_n$  molecules, almost all the molecules show inverse relation of  $\mu$  values with respect to the largest intensity of absorptions, while few exception have also been observed in the case of  $D_2A_5S_6-P_4L$ ,  $D_2A_5S_6-P_2L_3$ ,  $D_2A_6S_7-P_4L_2$ ,  $D_2A_7S_8-P_4L_3$  molecules and  $DA_3$  group as  $\mu$  values are directly proportional to largest intensity of absorption because of different shapes. The order of intensity and  $\mu$  trends for  $DA_n$  molecules are of  $DA_4S_4-P_2L_2 > DA_2S_2-L_2 > DA_3S_3-PL_2 > DA_2S_2-P_2 > DA_3S_3-P_2L > DA_2S_2-PL > DAS-P > DAS-L$  and  $DA_2S_2-PL > DA-L > DA_3S_3-P_2L > DAS-P > DA_3S_3-PL_2 > DA_2S_2-L_2 > DA_4S_4-P_2L_2 > DA_2S_2-P_2$  respectively. The comparative analysis of dipole moment with respect to  $\lambda_{max}$  has shown that like intensity, majority of our designed molecules display inverse relation.

Among DA<sub>n</sub>, D<sub>2</sub>A<sub>n</sub>, D<sub>3</sub>A<sub>n</sub> and D<sub>4</sub>A<sub>n</sub> molecules, only some molecules like D<sub>2</sub>A<sub>6</sub>S<sub>7</sub>-P<sub>4</sub>L<sub>2</sub>, D<sub>2</sub>A<sub>7</sub>S<sub>8</sub>-P<sub>4</sub>L<sub>3</sub> and all members of D<sub>2</sub>A<sub>4</sub> group demonstrate direct relation with respect to  $\lambda_{\max}$ .

### SIX: Molecular Orbital Compositions (in percentage)

**Table S8** Molecular orbital composition in percentage from  $\pi$ -spacer and donor-acceptor fragments DA<sub>n</sub>, D<sub>2</sub>A<sub>n</sub>, D<sub>3</sub>A<sub>n</sub> and D<sub>4</sub>A<sub>n</sub> designed donor molecules.

| Molecule                                                      | Energy Level | Acceptor Fragments | $\pi$ -spacer | Donor Fragments |
|---------------------------------------------------------------|--------------|--------------------|---------------|-----------------|
| DAS-L                                                         | HOMO         | 11                 | 9             | <b>80</b>       |
|                                                               | LUMO         | <b>80</b>          | 8             | 12              |
| DAS-P                                                         | HOMO         | 12                 | 11            | <b>77</b>       |
|                                                               | LUMO         | <b>80</b>          | 8             | 12              |
| DA <sub>2</sub> S <sub>2</sub> -L <sub>2</sub>                | HOMO         | 19                 | 17            | 64              |
|                                                               | LUMO         | <b>68</b>          | 11            | <b>21</b>       |
| DA <sub>2</sub> S <sub>2</sub> -P <sub>2</sub>                | HOMO         | 20                 | 18            | <b>62</b>       |
|                                                               | LUMO         | <b>69</b>          | 13            | 18              |
| DA <sub>2</sub> S <sub>2</sub> -PL                            | HOMO         | 18                 | 16            | <b>66</b>       |
|                                                               | LUMO         | <b>69</b>          | 11            | 10              |
| DA <sub>3</sub> S <sub>3</sub> -P <sub>2</sub> L              | HOMO         | 22                 | 20            | <b>58</b>       |
|                                                               | LUMO         | <b>63</b>          | 14            | 23              |
| DA <sub>3</sub> S <sub>3</sub> -PL <sub>2</sub>               | HOMO         | 21                 | 19            | <b>60</b>       |
|                                                               | LUMO         | 62                 | 13            | 25              |
| DA <sub>4</sub> S <sub>4</sub> -P <sub>2</sub> L <sub>2</sub> | HOMO         | 25                 | 22            | <b>53</b>       |
|                                                               | LUMO         | <b>57</b>          | 16            | 27              |

| Molecule                                                       | Energy Level | Acceptor Fragments | Ethyne ( $\pi$ -spacer) | Donor Fragments |
|----------------------------------------------------------------|--------------|--------------------|-------------------------|-----------------|
| D <sub>2</sub> AS <sub>2</sub> -L-I                            | HOMO         | 17                 | 18                      | <b>65</b>       |
|                                                                | LUMO         | <b>62</b>          | 15                      | 23              |
| D <sub>2</sub> AS <sub>2</sub> -L-II                           | HOMO         | 14                 | 10                      | <b>76</b>       |
|                                                                | LUMO         | <b>71</b>          | 11                      | 18              |
| D <sub>2</sub> AS <sub>2</sub> -L-III                          | HOMO         | 5                  | 15                      | <b>80</b>       |
|                                                                | LUMO         | <b>68</b>          | 10                      | 22              |
| D <sub>2</sub> AS <sub>2</sub> -P                              | HOMO         | 3                  | 13                      | <b>84</b>       |
|                                                                | LUMO         | <b>77</b>          | 8                       | 15              |
| D <sub>2</sub> A <sub>3</sub> S <sub>4</sub> -L <sub>3</sub>   | HOMO         | 21                 | 22                      | <b>57</b>       |
|                                                                | LUMO         | <b>58</b>          | 16                      | 26              |
| D <sub>2</sub> A <sub>3</sub> S <sub>4</sub> -P <sub>2</sub> L | HOMO         | 19                 | 20                      | <b>61</b>       |
|                                                                | LUMO         | <b>59</b>          | 16                      | 25              |
| D <sub>2</sub> A <sub>3</sub> S <sub>4</sub> -PL <sub>2</sub>  | HOMO         | 20                 | 21                      | <b>59</b>       |

|                                                                                 |      |           |    |           |
|---------------------------------------------------------------------------------|------|-----------|----|-----------|
|                                                                                 | LUMO | <b>59</b> | 16 | 25        |
| D <sub>2</sub> A <sub>4</sub> S <sub>5</sub> -PL <sub>3</sub>                   | HOMO | 22        | 22 | <b>56</b> |
|                                                                                 | LUMO | <b>57</b> | 17 | 26        |
| D <sub>2</sub> A <sub>4</sub> S <sub>5</sub> -P <sub>2</sub> L <sub>2</sub> -I  | HOMO | 22        | 22 | <b>56</b> |
|                                                                                 | LUMO | <b>57</b> | 17 | 26        |
| D <sub>2</sub> A <sub>4</sub> S <sub>5</sub> -P <sub>3</sub> L                  | HOMO | 22        | 22 | <b>56</b> |
|                                                                                 | LUMO | <b>57</b> | 17 | 26        |
| D <sub>2</sub> A <sub>4</sub> S <sub>5</sub> -P <sub>2</sub> L <sub>2</sub> -II | HOMO | 16        | 15 | <b>69</b> |
|                                                                                 | LUMO | <b>58</b> | 10 | 32        |
| D <sub>2</sub> A <sub>4</sub> S <sub>5</sub> -P <sub>4</sub>                    | HOMO | 15        | 20 | <b>65</b> |
|                                                                                 | LUMO | <b>56</b> | 15 | 29        |
| D <sub>2</sub> A <sub>5</sub> S <sub>6</sub> -P <sub>4</sub> L                  | HOMO | 22        | 22 | <b>56</b> |
|                                                                                 | LUMO | <b>56</b> | 17 | 27        |
| D <sub>2</sub> A <sub>5</sub> S <sub>6</sub> -P <sub>2</sub> L <sub>3</sub>     | HOMO | 22        | 23 | <b>55</b> |
|                                                                                 | LUMO | <b>55</b> | 17 | 28        |
| D <sub>2</sub> A <sub>6</sub> S <sub>7</sub> -P <sub>4</sub> L <sub>2</sub>     | HOMO | 17        | 23 | <b>60</b> |
|                                                                                 | LUMO | <b>50</b> | 17 | 33        |
| D <sub>2</sub> A <sub>7</sub> S <sub>8</sub> -P <sub>4</sub> L <sub>3</sub>     | HOMO | 25        | 24 | <b>51</b> |
|                                                                                 | LUMO | <b>53</b> | 19 | 28        |
| D <sub>3</sub> A <sub>3</sub> S <sub>5</sub> -P <sub>2</sub> L                  | HOMO | 17        | 20 | <b>63</b> |
|                                                                                 | LUMO | <b>59</b> | 16 | 25        |
| D <sub>3</sub> A <sub>4</sub> S <sub>6</sub> -P <sub>2</sub> L <sub>2</sub>     | HOMO | 18        | 20 | <b>62</b> |
|                                                                                 | LUMO | <b>58</b> | 16 | 26        |
| D <sub>4</sub> A <sub>3</sub> S <sub>6</sub> -P <sub>2</sub> L                  | HOMO | 17        | 19 | <b>64</b> |
|                                                                                 | LUMO | <b>57</b> | 17 | 26        |
| D <sub>4</sub> A <sub>4</sub> S <sub>8</sub> -P <sub>2</sub> L <sub>2</sub>     | HOMO | 18        | 20 | <b>62</b> |
|                                                                                 | LUMO | <b>56</b> | 16 | 28        |
| D <sub>4</sub> A <sub>4</sub> S <sub>7</sub> -L <sub>4</sub>                    | HOMO | 20        | 23 | <b>57</b> |
|                                                                                 | LUMO | <b>56</b> | 17 | 27        |

---

***SX: Chemical Structure of PDIs***

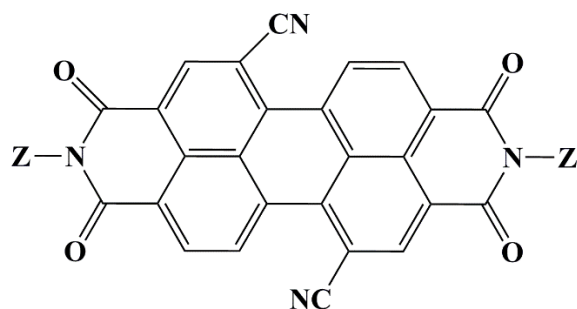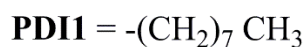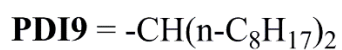

**Fig. S6** Chemical structures of the PDIs.

**Table S9** The Calculated energy data (in eV) of the FMOs of the PDI1 and PDI9 acceptor molecules.

| Name | HOMO (eV) | LUMO (eV) | Eg (eV) |
|------|-----------|-----------|---------|
| PDI1 | -6.75     | -4.00     | 2.75    |
| PDI9 | -6.76     | -3.97     | 2.79    |

**SXI: Absorption spectrum**

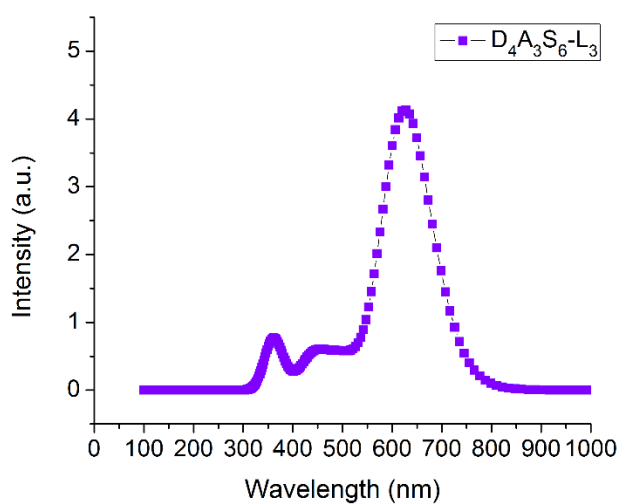

**Fig. S6** Absorption spectrum of  $\text{D}_4\text{A}_3\text{S}_6\text{-L}$  molecule.

**SXII: Reorganization Energy Values**

**Table S10** Electron ( $\lambda_e$ ) and hole ( $\lambda_h$ ) reorganization energy values for  $DA_n$ ,  $D_2A_n$ ,  $D_3A_n$  and  $D_4A_n$  designed molecules.

| Name                                     | $\lambda_e$ (eV) | $\lambda_h$ (eV) | Name                                           | $\lambda_e$ (eV) | $\lambda_h$ (eV) |
|------------------------------------------|------------------|------------------|------------------------------------------------|------------------|------------------|
| DAS-L                                    | 0.258            | 0.214            | $D_2A_4S_5$ -PL <sub>3</sub>                   | 0.142            | 0.142            |
| DAS-P                                    | 0.258            | 0.137            | $D_2A_4S_5$ -P <sub>2</sub> L <sub>2</sub> -I  | 0.157            | 0.136            |
| $DA_2S_2$ -L <sub>2</sub>                | 0.170            | 0.201            | $D_2A_4S_5$ -P <sub>3</sub> L                  | 0.135            | 0.113            |
| $DA_2S_2$ -P <sub>2</sub>                | 0.203            | 0.128            | $D_2A_4S_5$ -P <sub>2</sub> L <sub>2</sub> -II | 0.101            | 0.151            |
| $DA_2S_2$ -PL                            | 0.169            | 0.160            | $D_2A_4S_5$ -P <sub>4</sub>                    | 0.103            | 0.133            |
| $DA_3S_3$ -P <sub>2</sub> L              | 0.158            | 0.130            | $D_2A_5S_6$ -P <sub>4</sub> L                  | 0.111            | 0.100            |
| $DA_3S_3$ -PL <sub>2</sub>               | 0.152            | 0.168            | $D_2A_5S_6$ -P <sub>2</sub> L <sub>3</sub>     | 0.131            | 0.134            |
| $DA_4S_4$ -P <sub>2</sub> L <sub>2</sub> | 0.134            | 0.133            | $D_2A_6S_7$ -P <sub>4</sub> L <sub>2</sub>     | 0.102            | 0.149            |
| $D_2AS_2$ -L-I                           | 0.213            | 0.191            | $D_2A_4S_5$ -PL <sub>3</sub>                   | 0.117            | 0.111            |
| $D_2AS_2$ -L-II                          | 0.211            | 0.112            | $D_3A_3S_5$ -P <sub>2</sub> L                  | 0.125            | 0.111            |
| $D_2AS_2$ -L-III                         | 0.194            | 0.193            | $D_3A_4S_6$ -P <sub>2</sub> L <sub>2</sub>     | 0.111            | 0.106            |
| $D_2AS_2$ -P                             | 0.151            | 0.189            | $D_4A_3S_6$ -P <sub>2</sub> L                  | 0.108            | 0.104            |
| $D_2A_3S_4$ -L <sub>3</sub>              | 0.134            | 0.151            | $D_4A_4S_8$ -P <sub>2</sub> L <sub>2</sub>     | 0.100            | 0.101            |
| $D_2A_3S_4$ -P <sub>2</sub> L            | 0.161            | 0.140            | $D_4A_4S_7$ -L <sub>4</sub>                    | 0.114            | 0.115            |
| $D_2A_3S_4$ -PL <sub>2</sub>             | 0.145            | 0.148            |                                                |                  |                  |

### ***SXIII: Long Range Functional Comparison***

**Table S11** Calculated excitation energies (Ex), wavelength ( $\lambda_{abs}$ ) and oscillator strength ( $f$ ) based on TDDFT at the different levels of theory.

| Method                | $DA_4S_4$ -P <sub>2</sub> L <sub>2</sub> |               | $D_2A_5S_6$ -P <sub>4</sub> L |               | $D_2A_5S_6$ -P <sub>2</sub> L <sub>3</sub> |               |
|-----------------------|------------------------------------------|---------------|-------------------------------|---------------|--------------------------------------------|---------------|
|                       | $\lambda_{max}$<br>(nm)                  | $f$<br>(a.u.) | $\lambda_{max}$<br>(nm)       | $f$<br>(a.u.) | $\lambda_{max}$<br>(nm)                    | $f$<br>(a.u.) |
| TD-PBE0/6-31G(d)      | 554                                      | 0.92          | 607                           | 1.35          | 603                                        | 2.84          |
| TD-WB97XD/6-31G(d)    | 428                                      | 1.31          | 444                           | 2.17          | 443                                        | 3.68          |
| TD-CAM-B3LYP/6-31G(d) | 440                                      | 1.24          | 459                           | 2.12          | 460                                        | 3.55          |

*The End*
